# Supplementary material for: Synergistic nucleation regulation using 4,4′,4′′-tris(carbazol-9-yl)-triphenylamine and moisture for stably air-processed high-performance perovskite photodetectors
Source: Royal Society of Chemistry journal article supplement (doi:10.1039/d3nr06513h), 2024-01-01
Supplement: d3nr06513h1.pdf [file d3nr06513h1.pdf]

## Supporting Information

**Synergistic nucleation regulation strategy of 4',4''-Tris(carbazol-9-yl)-  
triphenylamine and moisture for stably air-processed high-performance  
perovskite photodetectors**

*Guo He,<sup>ab</sup> Dezhi Yang,<sup>\*ad</sup> Sizhe Tao,<sup>a</sup> Liqing Yang,<sup>a</sup> Dechao Guo,<sup>a</sup> Jingbo Zheng,<sup>a</sup> Ji  
Li,<sup>a</sup> Jiangshan Chen<sup>ad</sup> and Dongge Ma<sup>\*acde</sup>*

## Table of contents

1. The molecular structure of TCTA
2. The changes over time in transparency of TCTA-containing  $\text{PbX}_2$  precursor after air exposure
3. The XRD spectra of solvent-coordinated adduct powder obtained from  $\text{PbX}_2$  solutions without and with air exposure
4. The XRD spectra of the air-processed perovskite films with and without TCTA
5.  $J$ - $V$  characteristics of the hole-only devices under dark conditions
6. The responsivities of PPDs with and without TCTA
7. The noise currents and detectivities of PPDs with and without TCTA
8. The fitting data of the TRPL measurements of perovskite with and without TCTA
9. The average dark current densities of the PPDs with and without TCTA.
10. The average peak  $EQE$ s of the PPDs with and without TCTA.

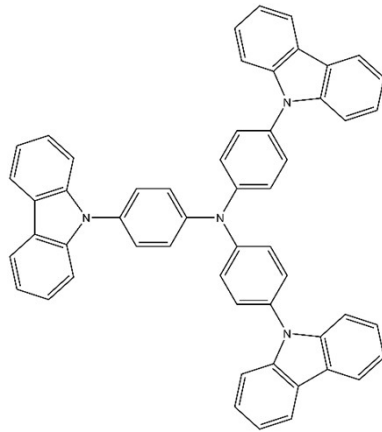

**Figure S1.** The molecular structure of TCTA

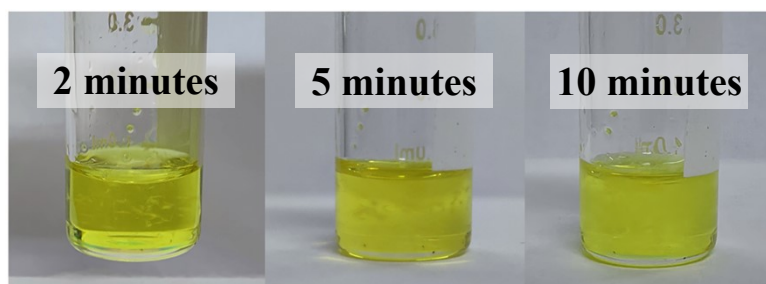

**Figure S2.** The changes over time in transparency of TCTA-containing  $\text{PbX}_2$  precursor after air exposure.

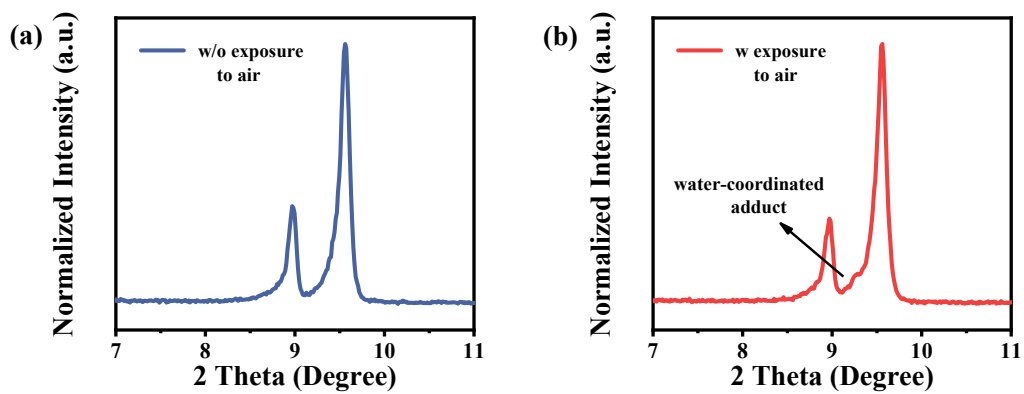

**Figure S3.** The XRD spectra of solvent-coordinated adduct powder obtained from  $\text{PbX}_2$  solutions (a) without and (b) with air exposure.

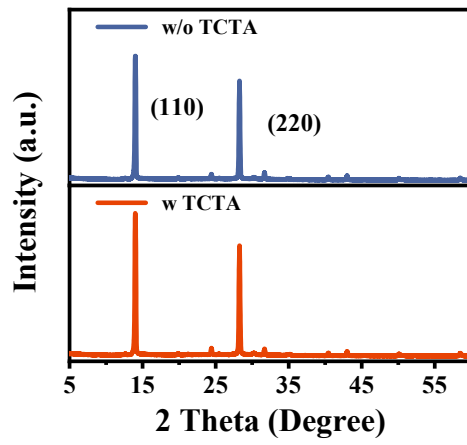

**Figure S4.** The XRD spectra of the air-processed perovskite films with and without TCTA.

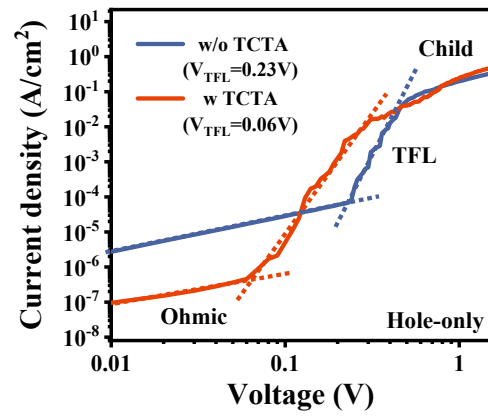

**Figure S5.**  $J$ - $V$  characteristics of the hole-only devices under dark conditions.

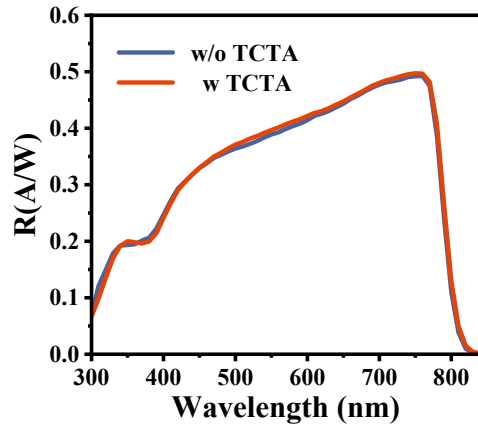

**Figure S6.** The responsivities of PPDs with and without TCTA.



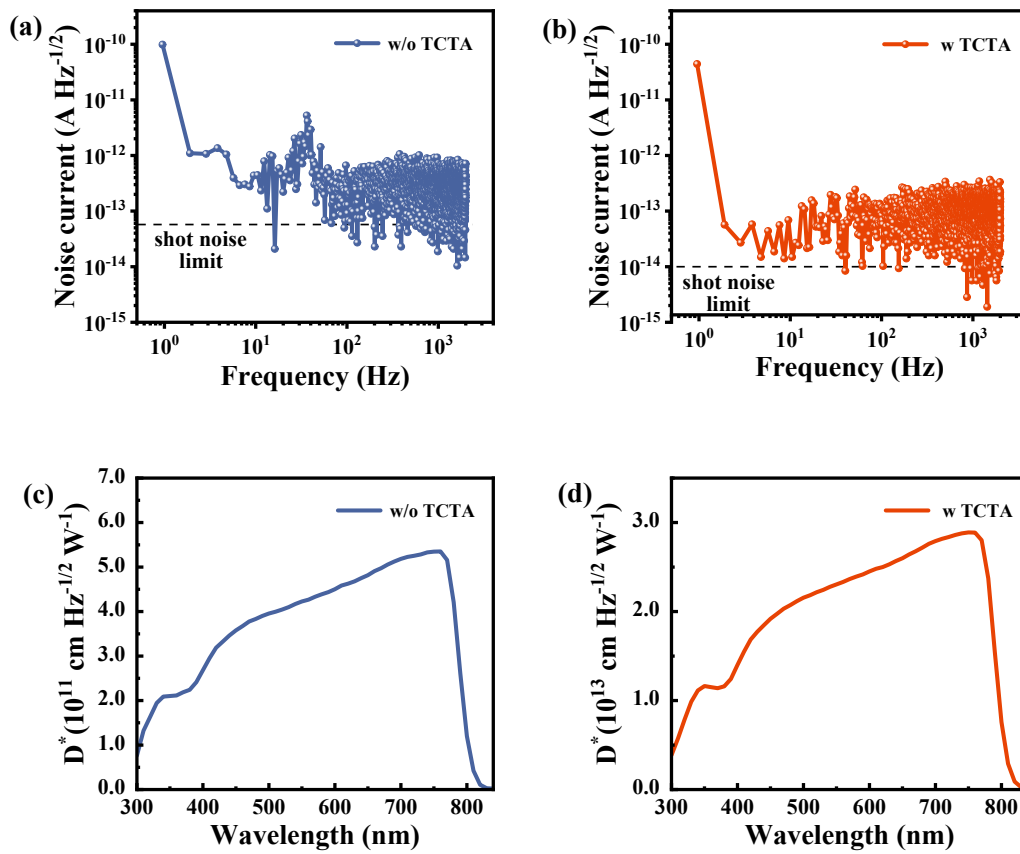

Figure S7. The noise currents and detectivities of PPDs with and without TCTA.

**Table S1. The fitting data of the TRPL measurements of perovskite with and without TCTA.**

| Sample   | $A_1$ | $\tau_1$ (ns) | $A_2$ | $\tau_2$ (ns) |
|----------|-------|---------------|-------|---------------|
| W TCTA   | 157.6 | 101.2         | 766.1 | 382.4         |
| W/o TCTA | 533.0 | 2.7           | 443.0 | 10.4          |

The PL decay curves were fitted using a bi-exponential decay equation :

$$y = A_1 \exp(-x/\tau_1) + A_2 \exp(-x/\tau_2) + y_0$$

Where  $\tau_1$  and  $\tau_2$  are the lifetimes for the fast and slow components, respectively.

The  $\tau_{\text{ave}}$  is given by the formula:

$$\tau_{\text{ave}} = (A_1 \tau_1^2 + A_2 \tau_2^2) / (A_1 \tau_1 + A_2 \tau_2)$$

**Table S2. The dark current densities of the PPDs with and without TCTA.**

|             |                                             |                       |                       |                       |                      |                       |
|-------------|---------------------------------------------|-----------------------|-----------------------|-----------------------|----------------------|-----------------------|
| <b>W</b>    | <b>Device number</b>                        | <b>A1</b>             | <b>A2</b>             | <b>A3</b>             | <b>A4</b>            | <b>A5</b>             |
|             | <b><math>J_d</math> (A cm<sup>-2</sup>)</b> | $2.2 \times 10^{-10}$ | $3.6 \times 10^{-10}$ | $1.8 \times 10^{-10}$ | $1.1 \times 10^{-9}$ | $2.4 \times 10^{-10}$ |
| <b>TCTA</b> | <b>Device number</b>                        | <b>A6</b>             | <b>A7</b>             | <b>A8</b>             | <b>A9</b>            | <b>A10</b>            |
|             | <b><math>J_d</math> (A cm<sup>-2</sup>)</b> | $4.7 \times 10^{-10}$ | $7.5 \times 10^{-10}$ | $9.4 \times 10^{-10}$ | $1.0 \times 10^{-9}$ | $2.4 \times 10^{-10}$ |
| <b>W/o</b>  | <b>Device number</b>                        | <b>B1</b>             | <b>B2</b>             | <b>B3</b>             | <b>B4</b>            | <b>B5</b>             |
|             | <b><math>J_d</math> (A cm<sup>-2</sup>)</b> | $3.1 \times 10^{-8}$  | $1.0 \times 10^{-8}$  | $2.2 \times 10^{-8}$  | $2.5 \times 10^{-9}$ | $7.5 \times 10^{-9}$  |
| <b>TCTA</b> | <b>Device number</b>                        | <b>B6</b>             | <b>B7</b>             | <b>B8</b>             | <b>B9</b>            | <b>B10</b>            |
|             | <b><math>J_d</math> (A cm<sup>-2</sup>)</b> | $4.7 \times 10^{-9}$  | $1.1 \times 10^{-8}$  | $8.3 \times 10^{-9}$  | $4.9 \times 10^{-9}$ | $3.5 \times 10^{-9}$  |

The average dark current densities of PPDs with and without TCTA are  $5.6 \times 10^{-10}$  A cm<sup>-2</sup> and  $1.1 \times 10^{-8}$  A cm<sup>-2</sup>, respectively.

**Table S3. The peak *EQE*s of the PPDs with and without TCTA.**

|             |                       |           |           |           |           |            |
|-------------|-----------------------|-----------|-----------|-----------|-----------|------------|
| <b>W</b>    | <b>Device number</b>  | <b>A1</b> | <b>A2</b> | <b>A3</b> | <b>A4</b> | <b>A5</b>  |
|             | <b><i>EQE</i> (%)</b> | 90.1      | 90.0      | 96.5      | 91.9      | 92.0       |
| <b>TCTA</b> | <b>Device number</b>  | <b>A6</b> | <b>A7</b> | <b>A8</b> | <b>A9</b> | <b>A10</b> |
|             | <b><i>EQE</i> (%)</b> | 93.4      | 91.3      | 92.44     | 93.4      | 93.2       |
| <b>W/o</b>  | <b>Device number</b>  | <b>B1</b> | <b>B2</b> | <b>B3</b> | <b>B4</b> | <b>B5</b>  |
|             | <b><i>EQE</i> (%)</b> | 91.5      | 92.1      | 91.3      | 93.7      | 90.3       |
| <b>TCTA</b> | <b>Device number</b>  | <b>B6</b> | <b>B7</b> | <b>B8</b> | <b>B9</b> | <b>B10</b> |
|             | <b><i>EQE</i> (%)</b> | 90.3      | 89.4      | 90.1      | 91.0      | 88.6       |

The average peak *EQE*s of PPDs with and without TCTA are 92.8 % and 90.8 %, respectively.
